# Supplementary material for: Linked dimensions of psychopathology and connectivity in functional brain networks
Source: PubMed Central journal article supplement (PMC6070480; doi:10.1038/s41467-018-05317-y), 2018-08-01
Supplement: 41467_2018_5317_MOESM3_ESM.pdf [file 41467_2018_5317_MOESM3_ESM.pdf]

**Description of Additional Supplementary Files:**

**Supplementary Data 1:** A long table that contains the details of the 111 clinical items used in the study, including the DSM category, item labels and specific questions from the GOASSESS semi-structured interview.
